# Supplementary material
Source: PubMed Central journal article supplement (PMC7062584)
Supplement: NIHMS1554626-supplement-1.pdf [file NIHMS1554626-supplement-1.pdf]

## Supplementary Materials

### Additional Simulation Results

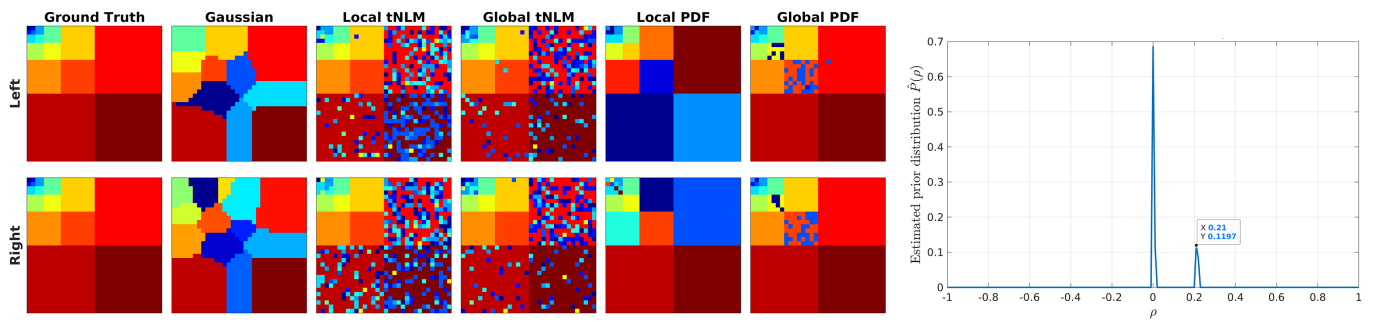

Figure S1: Simulation results with partial correlation  $c = 0.75, \rho = 0.214$ .

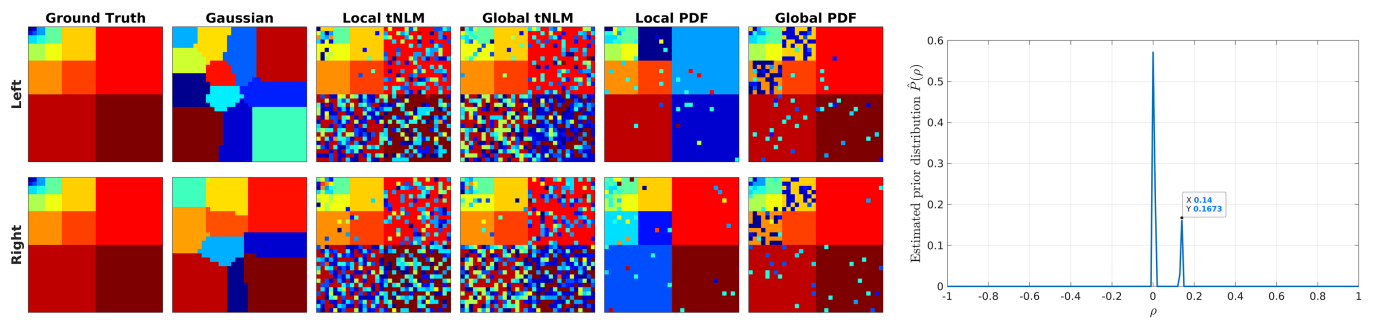

Figure S2: Simulation results with partial correlation  $c = 0.5, \rho = 0.143$ .

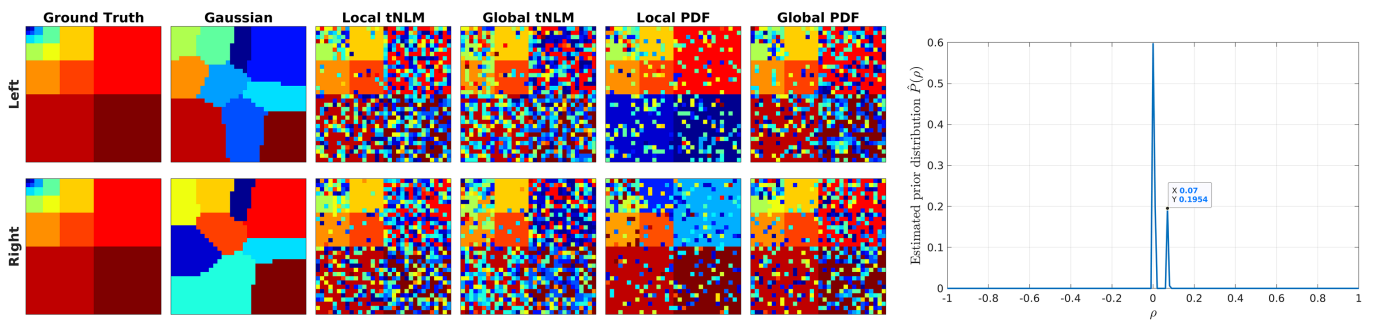

Figure S3: Simulation results with partial correlation  $c = 0.25, \rho = 0.071$ .

### Additional Seeded Correlation Results

#### Motor Network

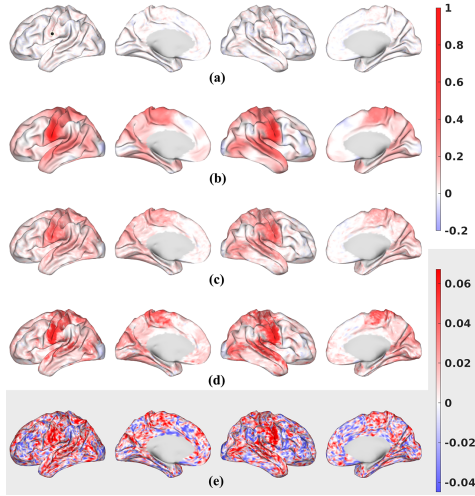

Figure S4: Seeded correlation maps. The seed was placed on the left somato-motor cortex near the face area.

#### Auditory Network

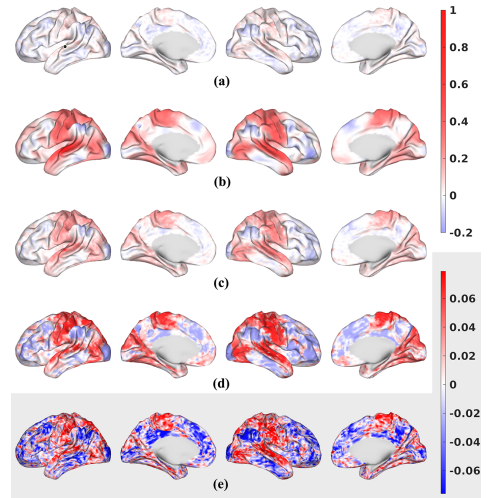

Figure S6: Seeded correlation maps. The seed was placed on the left auditory cortex.

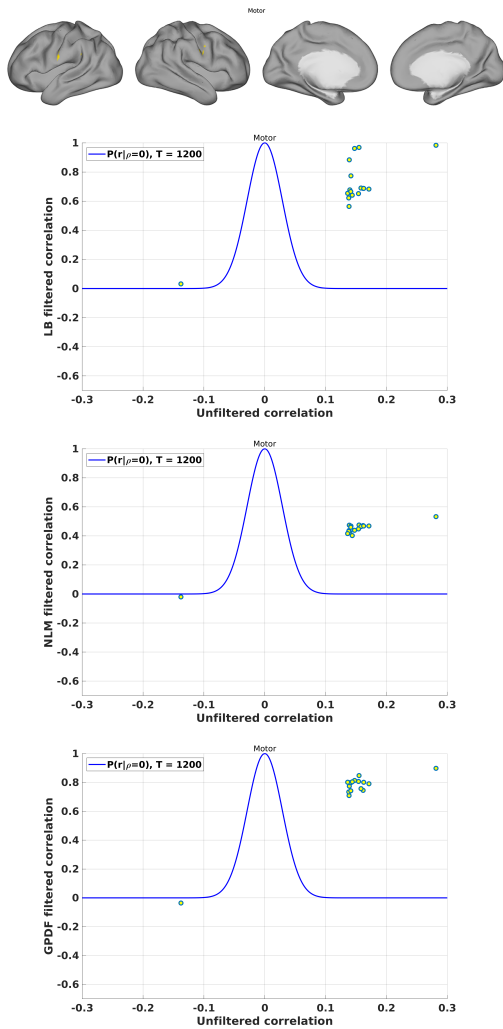

Figure S5: Scatter plots of the high correlation values.

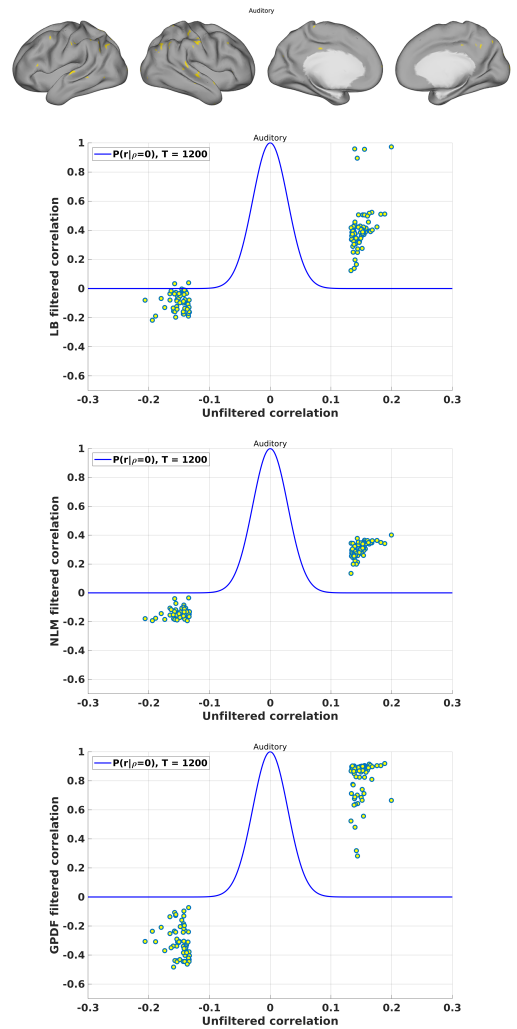

Figure S7: Scatter plots of the high correlation values.

**Executive Control Network**

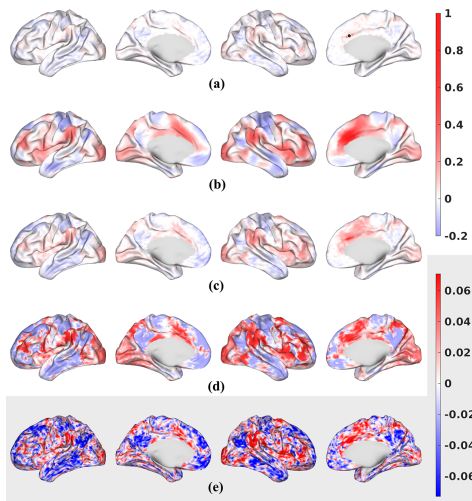

Figure S8: Seeded correlation maps. The seed was placed on the right anterior cingulate cortex.

**Saliency Network**

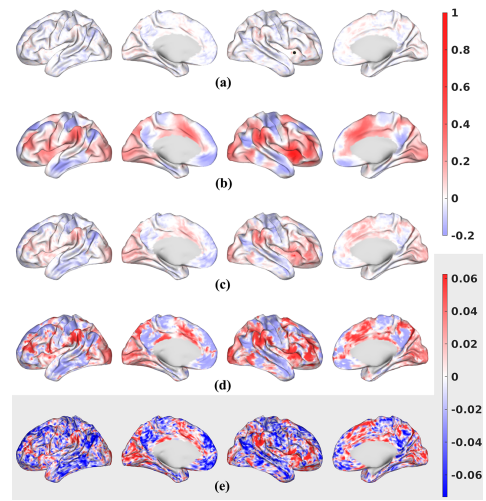

Figure S10: Seeded correlation maps. The seed was placed on the right anterior insula.

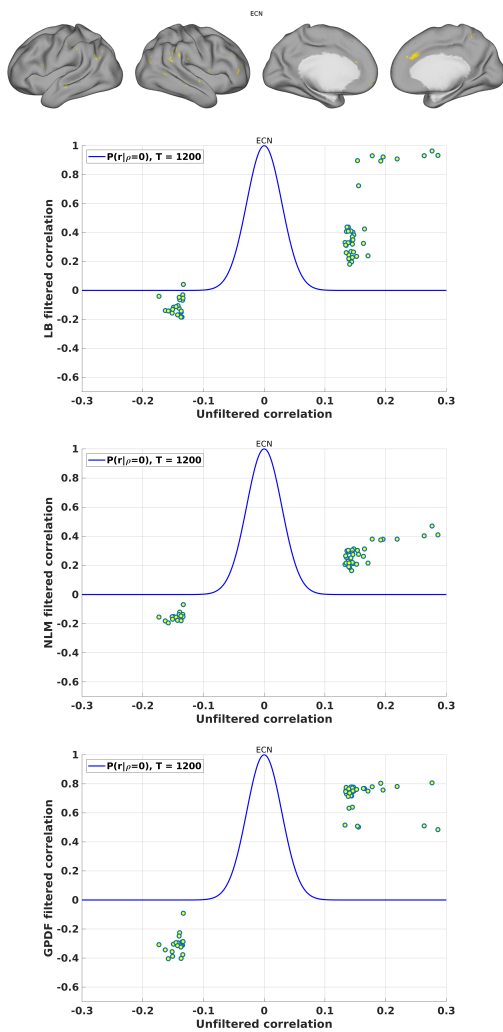

Figure S9: Scatter plots of the high correlation values.

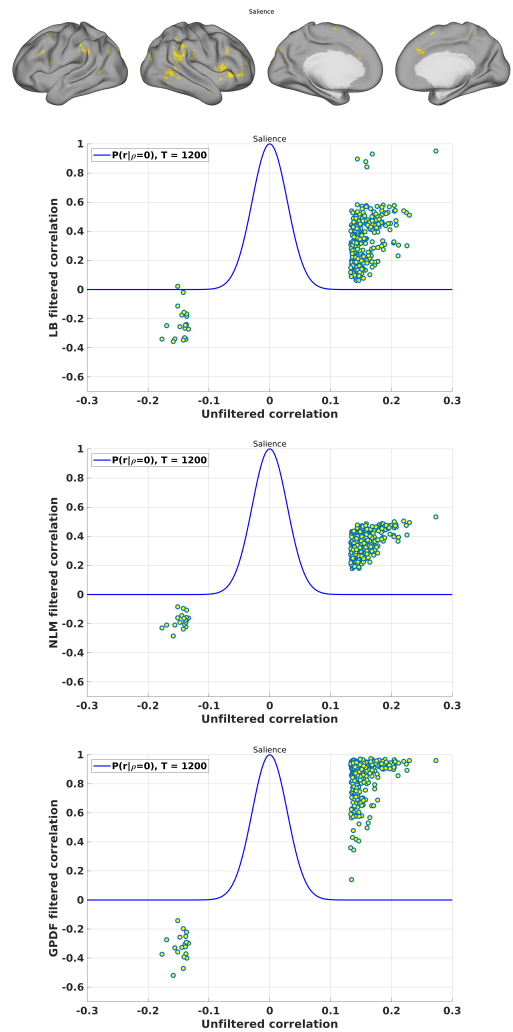

Figure S11: Scatter plots of the high correlation values.

### Fronto-Parietal Attentional Control Network

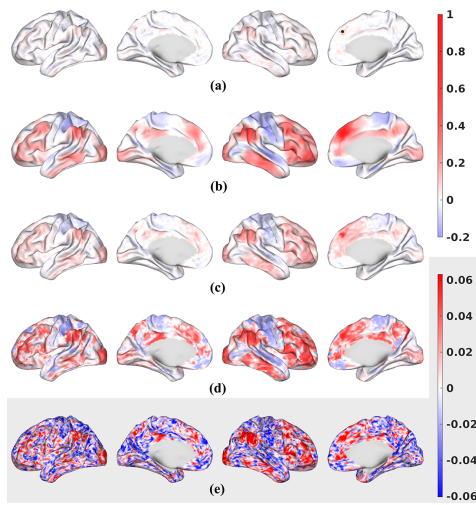

Figure S12: Seeded correlation maps. The seed was placed on the right dorso-medial prefrontal cortex.

### Language Network

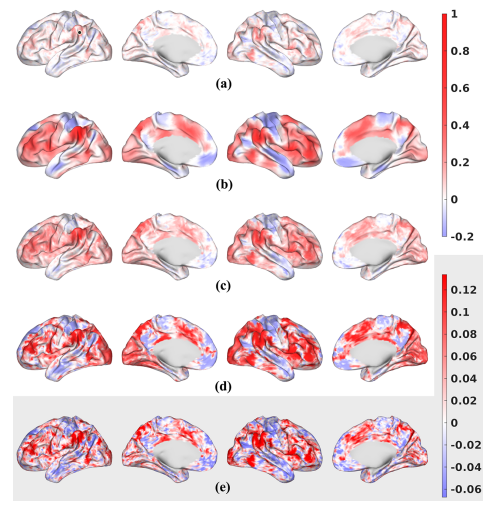

Figure S14: Seeded correlation maps. The seed was placed on the Wernicke's area.

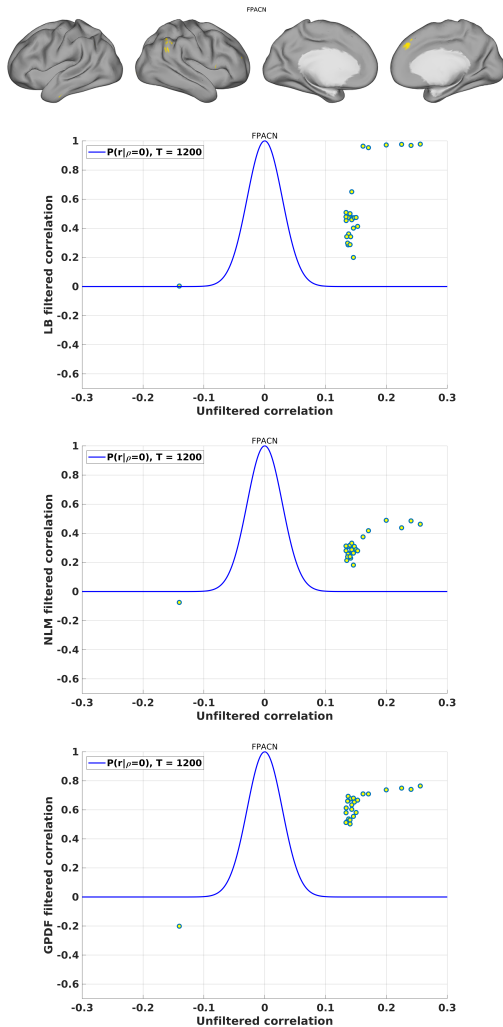

Figure S13: Scatter plots of the high correlation values.

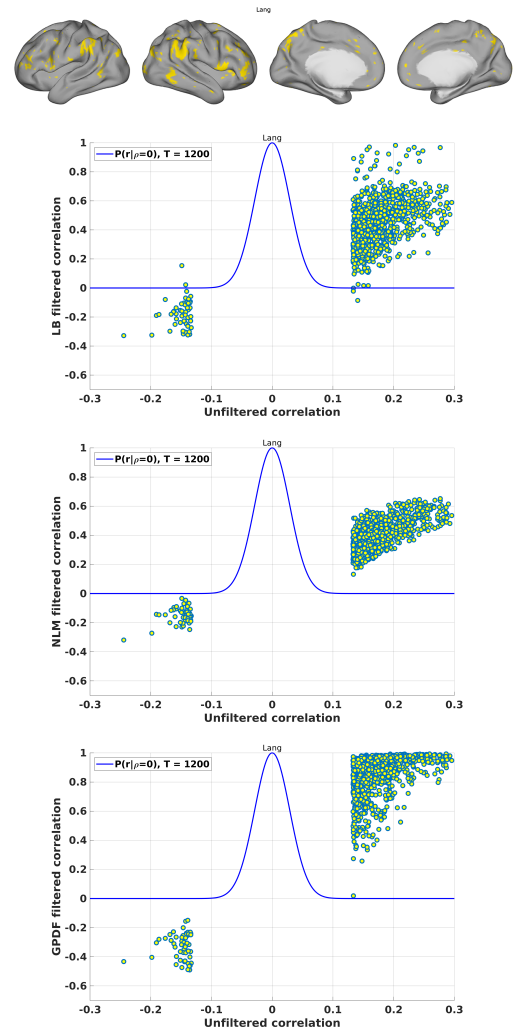

Figure S15: Scatter plots of the high correlation values.

## Skewness Statistics

Table S1: Statistics (Wilcoxon signed rank) of skewness difference between GPDF and the unfiltered, the LB-filtered as well as the tNLM-filtered case.

| Task       | Contrast      | z-score<br>(GPDF ><br>Unfiltered) | p-value<br>(GPDF ><br>Unfiltered) | z-score<br>(GPDF ><br>LB) | p-value<br>(GPDF ><br>LB) | z-score<br>(GPDF ><br>tNLM) | p-value<br>(GPDF ><br>tNLM) |
|------------|---------------|-----------------------------------|-----------------------------------|---------------------------|---------------------------|-----------------------------|-----------------------------|
| Motor      | t_avg         | 6.83                              | $4.27 \times 10^{-12}$            | 10.97                     | $2.64 \times 10^{-28}$    | 5.51                        | $1.77 \times 10^{-8}$       |
|            | lh_avg        | 6.49                              | $4.29 \times 10^{-11}$            | 10.97                     | $2.80 \times 10^{-28}$    | 5.77                        | $3.94 \times 10^{-9}$       |
|            | rh_avg        | 6.48                              | $4.70 \times 10^{-11}$            | 10.97                     | $2.64 \times 10^{-28}$    | 6.06                        | $6.78 \times 10^{-10}$      |
|            | lf_avg        | 7.16                              | $3.95 \times 10^{-13}$            | 10.96                     | $2.96 \times 10^{-28}$    | 7.16                        | $4.15 \times 10^{-13}$      |
|            | rf_avg        | 6.27                              | $1.82 \times 10^{-10}$            | 10.97                     | $2.75 \times 10^{-28}$    | 7.36                        | $9.51 \times 10^{-14}$      |
| Language   | math_story    | 7.67                              | $8.90 \times 10^{-15}$            | 10.97                     | $2.64 \times 10^{-28}$    | 6.76                        | $7.10 \times 10^{-12}$      |
| Emotion    | faces_shapes  | 8.04                              | $4.48 \times 10^{-16}$            | 10.96                     | $3.07 \times 10^{-28}$    | 9.75                        | $8.85 \times 10^{-23}$      |
| Gambling   | punish_reward | 6.87                              | $3.21 \times 10^{-12}$            | 10.97                     | $2.64 \times 10^{-28}$    | 8.33                        | $3.93 \times 10^{-17}$      |
| Relational | match_rel     | 7.87                              | $1.81 \times 10^{-15}$            | 10.63                     | $1.13 \times 10^{-26}$    | 9.99                        | $1.03 \times 10^{-23}$      |
| Social     | random_tom    | 7.89                              | $1.57 \times 10^{-15}$            | 10.97                     | $2.64 \times 10^{-28}$    | 8.49                        | $1.03 \times 10^{-17}$      |
| WM         | 0bk_2bk       | 7.37                              | $8.37 \times 10^{-14}$            | 10.97                     | $2.64 \times 10^{-28}$    | 5.99                        | $1.05 \times 10^{-9}$       |
|            | face_avg      | 7.99                              | $6.60 \times 10^{-16}$            | 10.95                     | $3.25 \times 10^{-28}$    | 7.89                        | $1.49 \times 10^{-15}$      |
|            | place_avg     | 8.21                              | $1.13 \times 10^{-16}$            | 10.97                     | $2.69 \times 10^{-28}$    | 7.57                        | $1.94 \times 10^{-14}$      |
|            | tool_avg      | 7.68                              | $8.11 \times 10^{-15}$            | 10.97                     | $2.69 \times 10^{-28}$    | 7.33                        | $1.12 \times 10^{-13}$      |
|            | body_avg      | 8.01                              | $5.44 \times 10^{-16}$            | 10.97                     | $2.69 \times 10^{-28}$    | 7.32                        | $1.27 \times 10^{-13}$      |
